# Supplementary material for: Transcriptome Profiling and Cytological Assessments for Identifying Regulatory Pathways Associated With Diorcinol N-Induced Autophagy in A3 Cells
Source: Front Pharmacol. 2020 Oct 15;11:570450. doi: 10.3389/fphar.2020.570450 (PMC7593552; doi:10.3389/fphar.2020.570450)
Supplement: Supplementary file 2 [file Table_2.xlsx]

## Sheet: LCAT_18vsCn_KEGGenrich_signific
Table S8 KEGG analysis of regulated genes by 12.5 μM DN in A3 cells
KEGGID	Description	GeneRatio	BgRatio	pvalue	padj	geneID	geneName	keggID	Count
hsa03040	Spliceosome	98/2692	126/6252	1.08205e-15	3.39763e-13	ENSG00000100650/ENSG00000135486/ENSG00000170144/ENSG00000174231/ENSG00000063244/ENSG00000124193/ENSG00000113649/ENSG00000099783/ENSG00000169564/ENSG00000165119/ENSG00000179950/ENSG00000198231/ENSG00000161547/ENSG00000067596/ENSG00000153187/ENSG00000141759/ENSG00000189091/ENSG00000146007/ENSG00000111786/ENSG00000105618/ENSG00000101161/ENSG00000087365/ENSG00000265241/ENSG00000108883/ENSG00000183684…	SRSF5/HNRNPA1/HNRNPA3/PRPF8/U2AF2/SRSF6/TCERG1/HNRNPM/PCBP1/HNRNPK/PUF60/DDX42/SRSF2/DHX8/HNRNPU/TXNL4A/SF3B3/ZMAT2/SRSF9/PRPF31/PRPF6/SF3B2/RBM8A/EFTUD2/ALYREF/RBM25/SRSF8/SNRPC/PRPF19/SRSF3/WBP11/HNRNPC/SART1/RBMX/PRPF40A/SNW1/SNRNP200/SNU13/SLU7/SF3B1/U2SURP/SF3A1/SNRPA/DDX5/SNRPF/CCDC12/DDX23/SNRPD3/RBM17/SF3B4/SNRPA1/SNRPD1/NCBP2/LSM7/SNRPB/PPIH/MAGOH/SNRPE/AQR/SNRPB2/DHX15/ACIN1/RBM22/CDC5L…	hsa:6430/hsa:3178/hsa:220988/hsa:10594/hsa:11338/hsa:6431/hsa:10915/hsa:4670/hsa:5093/hsa:3190/hsa:22827/hsa:11325/hsa:6427/hsa:1659/hsa:3192/hsa:10907/hsa:23450/hsa:153527/hsa:8683/hsa:26121/hsa:24148/hsa:10992/hsa:9939/hsa:9343/hsa:10189/hsa:58517/hsa:10929/hsa:6631/hsa:27339/hsa:6428/hsa:51729/hsa:3183/hsa:9092/hsa:27316/hsa:55660/hsa:22938/hsa:23020/hsa:4809/hsa:10569/hsa:23451/hsa:23350/hsa:…	98
hsa04141	Protein processing in endoplasmic reticulum	107/2692	155/6252	3.4831e-11	5.46847e-09	ENSG00000149428/ENSG00000044574/ENSG00000179218/ENSG00000166598/ENSG00000087074/ENSG00000118705/ENSG00000096384/ENSG00000128272/ENSG00000127022/ENSG00000155660/ENSG00000089597/ENSG00000132388/ENSG00000058262/ENSG00000133265/ENSG00000107262/ENSG00000167004/ENSG00000165280/ENSG00000119318/ENSG00000134109/ENSG00000244038/ENSG00000137055/ENSG00000145495/ENSG00000140943/ENSG00000136731/ENSG00000148719…	HYOU1/HSPA5/CALR/HSP90B1/PPP1R15A/RPN2/HSP90AB1/ATF4/CANX/PDIA4/GANAB/UBE2G1/SEC61A1/HSPBP1/BAG1/PDIA3/VCP/RAD23B/EDEM1/DDOST/PLAA/MARCH6/MBTPS1/UGGT1/DNAJB12/UBE2J1/PDIA6/NPLOC4/P4HB/UBE2G2/SEL1L/XBP1/EIF2AK1/LMAN2/SEC13/ERP29/UBE2D3/UBQLN1/SEC61B/SEC63/SSR1/RPN1/HSPH1/DERL1/SEC31B/MAP2K7/MAN1A2/OS9/EIF2S1/STT3B/SSR2/SKP1/STUB1/RAD23A/HERPUD1/UBE4B/STT3A/UBE2J2/ERO1A/TUSC3/SSR4/BCAP31/DNAJB11/PR…	hsa:10525/hsa:3309/hsa:811/hsa:7184/hsa:23645/hsa:6185/hsa:3326/hsa:468/hsa:821/hsa:9601/hsa:23193/hsa:7326/hsa:29927/hsa:23640/hsa:573/hsa:2923/hsa:7415/hsa:5887/hsa:9695/hsa:1650/hsa:9373/hsa:10299/hsa:8720/hsa:56886/hsa:54788/hsa:51465/hsa:10130/hsa:55666/hsa:5034/hsa:7327/hsa:6400/hsa:7494/hsa:27102/hsa:10960/hsa:6396/hsa:10961/hsa:7323/hsa:29979/hsa:10952/hsa:11231/hsa:6745/hsa:6184/hsa:1080…	107
hsa03013	RNA transport	109/2692	160/6252	8.17976e-11	8.56149e-09	ENSG00000114867/ENSG00000063046/ENSG00000090621/ENSG00000070756/ENSG00000106263/ENSG00000084623/ENSG00000125977/ENSG00000102900/ENSG00000047410/ENSG00000132341/ENSG00000130741/ENSG00000101146/ENSG00000107581/ENSG00000093000/ENSG00000175390/ENSG00000133226/ENSG00000110321/ENSG00000265241/ENSG00000108349/ENSG00000184900/ENSG00000183684/ENSG00000005007/ENSG00000023734/ENSG00000104408/ENSG00000130811…	EIF4G1/EIF4B/PABPC4/PABPC1/EIF3B/EIF3I/EIF2S2/NUP93/TPR/RAN/EIF2S3/RAE1/EIF3A/NUP50/EIF3F/SRRM1/EIF4G2/RBM8A/CASC3/SUMO3/ALYREF/UPF1/STRAP/EIF3E/EIF3G/EIF5/EIF5B/SEC13/POM121/EEF1A1/EIF1/CLNS1A/UBE2I/EIF3J/PAIP1/POM121C/NUP188/ELAC2/KPNB1/XPO5/RNPS1/EIF1AX/NUP214/EIF3H/CYFIP2/GEMIN4/EIF2S1/EIF2B5/EIF3D/NCBP2/SAP18/NUP98/NUP205/EIF4G3/RANGAP1/NUP160/MAGOH/TGS1/NXT1/POP7/PRMT5/EIF4EBP1/NUP54/SUMO2/…	hsa:1981/hsa:1975/hsa:8761/hsa:26986/hsa:8662/hsa:8668/hsa:8894/hsa:9688/hsa:7175/hsa:5901/hsa:1968/hsa:8480/hsa:8661/hsa:10762/hsa:8665/hsa:10250/hsa:1982/hsa:9939/hsa:22794/hsa:6612/hsa:10189/hsa:5976/hsa:11171/hsa:3646/hsa:8666/hsa:1983/hsa:9669/hsa:6396/hsa:9883/hsa:1915/hsa:10209/hsa:1207/hsa:7329/hsa:8669/hsa:10605/hsa:100101267/hsa:23511/hsa:60528/hsa:3837/hsa:57510/hsa:10921/hsa:1964/hsa:…	109
hsa03010	Ribosome	87/2692	129/6252	1.45609e-08	1.14303e-06	ENSG00000161016/ENSG00000149273/ENSG00000115268/ENSG00000148303/ENSG00000143314/ENSG00000100316/ENSG00000128626/ENSG00000105640/ENSG00000063177/ENSG00000140988/ENSG00000114686/ENSG00000167526/ENSG00000197958/ENSG00000048544/ENSG00000242485/ENSG00000188846/ENSG00000169288/ENSG00000165502/ENSG00000198755/ENSG00000182180/ENSG00000122406/ENSG00000130255/ENSG00000105193/ENSG00000137154/ENSG00000166441…	RPL8/RPS3/RPS15/RPL7A/MRPL24/RPL3/MRPS12/RPL18A/RPL18/RPS2/MRPL3/RPL13/RPL12/MRPS10/MRPL20/RPL14/MRPL1/RPL36AL/RPL10A/MRPS16/RPL5/RPL36/RPS16/RPS6/RPL27A/MRPL9/RPL22/RPS26/RPL6/MRPL21/MRPL34/RPS23/RPL19/RPL36A/RPS8/RPL29/RPLP1/RPL4/RPL22L1/RPL17/RPLP0/MRPL19/RPL15/RPL23A/MRPS2/RPS25/RPL10/RPL23/MRPL12/MRPS7/RPL38/RPS5/RPLP2/RSL24D1/RPL41/RPL21/RPS13/RPL37A/MRPL14/MRPS17/MRPL16/MRPL4/RPL13A/RPS24/…	hsa:6132/hsa:6188/hsa:6209/hsa:6130/hsa:79590/hsa:6122/hsa:6183/hsa:6142/hsa:6141/hsa:6187/hsa:11222/hsa:6137/hsa:6136/hsa:55173/hsa:55052/hsa:9045/hsa:65008/hsa:6166/hsa:4736/hsa:51021/hsa:6125/hsa:25873/hsa:6217/hsa:6194/hsa:6157/hsa:65005/hsa:6146/hsa:6231/hsa:6128/hsa:219927/hsa:64981/hsa:6228/hsa:6143/hsa:6173/hsa:6202/hsa:6159/hsa:6176/hsa:6124/hsa:200916/hsa:6139/hsa:6175/hsa:9801/hsa:6138…	87
hsa03008	Ribosome biogenesis in eukaryotes	56/2692	77/6252	1.08817e-07	6.83368e-06	ENSG00000163938/ENSG00000163811/ENSG00000130826/ENSG00000145912/ENSG00000055044/ENSG00000124784/ENSG00000132341/ENSG00000088930/ENSG00000107937/ENSG00000126749/ENSG00000101266/ENSG00000135372/ENSG00000136718/ENSG00000130119/ENSG00000119285/ENSG00000120158/ENSG00000165733/ENSG00000109534/ENSG00000070770/ENSG00000141101/ENSG00000011260/ENSG00000189306/ENSG00000165271/ENSG00000134987/ENSG00000100138…	GNL3/WDR43/DKC1/NHP2/NOP58/RIOK1/RAN/XRN2/GTPBP4/EMG1/CSNK2A1/NAT10/IMP4/GNL3L/HEATR1/RCL1/BMS1/GAR1/CSNK2A2/NOB1/UTP18/RRP7A/NOL6/WDR36/SNU13/WDR3/REXO1/IMP3/NOP56/FBL/PWP2/UTP14A/TBL3/TCOF1/NXT1/POP7/LSG1/RPP40/RBM28/UTP15/REXO2/SNORD3A/EIF6/XPO1/NOP10/MDN1/XRN1/CSNK2A3/WDR75/SPATA5/UTP6/RIOK2/FCF1/MPHOSPH10/RPP30/RPP25L	hsa:26354/hsa:23160/hsa:1736/hsa:55651/hsa:51602/hsa:83732/hsa:5901/hsa:22803/hsa:23560/hsa:10436/hsa:1457/hsa:55226/hsa:92856/hsa:54552/hsa:55127/hsa:10171/hsa:9790/hsa:54433/hsa:1459/hsa:28987/hsa:51096/hsa:27341/hsa:65083/hsa:134430/hsa:4809/hsa:10885/hsa:57455/hsa:55272/hsa:10528/hsa:2091/hsa:5822/hsa:10813/hsa:10607/hsa:6949/hsa:29107/hsa:10248/hsa:55341/hsa:10799/hsa:55131/hsa:84135/hsa:259…	56
hsa03050	Proteasome	32/2692	41/6252	5.02524e-06	0.000262987	ENSG00000101182/ENSG00000108344/ENSG00000126067/ENSG00000131467/ENSG00000175166/ENSG00000163636/ENSG00000100804/ENSG00000159352/ENSG00000173692/ENSG00000125818/ENSG00000108671/ENSG00000142507/ENSG00000103035/ENSG00000197170/ENSG00000185627/ENSG00000205220/ENSG00000068878/ENSG00000100567/ENSG00000159377/ENSG00000129084/ENSG00000087191/ENSG00000092010/ENSG00000099341/ENSG00000132963/ENSG00000041357…	PSMA7/PSMD3/PSMB2/PSME3/PSMD2/PSMD6/PSMB5/PSMD4/PSMD1/PSMF1/PSMD11/PSMB6/PSMD7/PSMD12/PSMD13/PSMB10/PSME4/PSMA3/PSMB4/PSMA1/PSMC5/PSME1/PSMD8/POMP/PSMA4/PSMD14/PSMA5/PSMC1/PSMA6/PSMC4/SEM1/PSMC3	hsa:5688/hsa:5709/hsa:5690/hsa:10197/hsa:5708/hsa:9861/hsa:5693/hsa:5710/hsa:5707/hsa:9491/hsa:5717/hsa:5694/hsa:5713/hsa:5718/hsa:5719/hsa:5699/hsa:23198/hsa:5684/hsa:5692/hsa:5682/hsa:5705/hsa:5720/hsa:5714/hsa:51371/hsa:5685/hsa:10213/hsa:5686/hsa:5700/hsa:5687/hsa:5704/hsa:7979/hsa:5702	32
hsa04110	Cell cycle	75/2692	119/6252	7.58466e-06	0.000314761	ENSG00000136997/ENSG00000108953/ENSG00000117399/ENSG00000134057/ENSG00000114126/ENSG00000153107/ENSG00000253729/ENSG00000072501/ENSG00000166913/ENSG00000166851/ENSG00000073111/ENSG00000134308/ENSG00000157456/ENSG00000111276/ENSG00000089053/ENSG00000105810/ENSG00000100393/ENSG00000164924/ENSG00000112576/ENSG00000170027/ENSG00000135476/ENSG00000129055/ENSG00000113558/ENSG00000002822/ENSG00000164109…	MYC/YWHAE/CDC20/CCNB1/TFDP2/ANAPC1/PRKDC/SMC1A/YWHAB/PLK1/MCM2/YWHAQ/CCNB2/CDKN1B/ANAPC5/CDK6/EP300/YWHAZ/CCND3/YWHAG/ESPL1/ANAPC13/SKP1/MAD1L1/MAD2L1/E2F4/MCM5/CDC25B/SMAD4/RB1/CDC16/MCM3/CDK4/CREBBP/RAD21/HDAC1/CCNA2/PCNA/ABL1/SKP2/MCM7/E2F2/CDKN2D/RBL2/ATR/RBL1/ZBTB17/PTTG1/GADD45A/MCM4/CCND2/ATM/PKMYT1/CDK2/ORC1/ANAPC7/MCM6/HDAC2/SMAD3/CDC27/SMC1B/TGFB3/E2F3/CDK1/TGFB1/TP53/CDC23/SMC3/ANAPC11…	hsa:4609/hsa:7531/hsa:991/hsa:891/hsa:7029/hsa:64682/hsa:5591/hsa:8243/hsa:7529/hsa:5347/hsa:4171/hsa:10971/hsa:9133/hsa:1027/hsa:51433/hsa:1021/hsa:2033/hsa:7534/hsa:896/hsa:7532/hsa:9700/hsa:25847/hsa:6500/hsa:8379/hsa:4085/hsa:1874/hsa:4174/hsa:994/hsa:4089/hsa:5925/hsa:8881/hsa:4172/hsa:1019/hsa:1387/hsa:5885/hsa:3065/hsa:890/hsa:5111/hsa:25/hsa:6502/hsa:4176/hsa:1870/hsa:1032/hsa:5934/hsa:54…	75
hsa03018	RNA degradation	49/2692	71/6252	8.01939e-06	0.000314761	ENSG00000090621/ENSG00000070756/ENSG00000067057/ENSG00000108515/ENSG00000135473/ENSG00000111596/ENSG00000088930/ENSG00000144381/ENSG00000077348/ENSG00000133639/ENSG00000113013/ENSG00000138035/ENSG00000198791/ENSG00000083520/ENSG00000110063/ENSG00000223496/ENSG00000171824/ENSG00000074800/ENSG00000166889/ENSG00000112941/ENSG00000155508/ENSG00000130332/ENSG00000110367/ENSG00000159388/ENSG00000039123…	PABPC4/PABPC1/PFKP/ENO3/PAN2/CNOT2/XRN2/HSPD1/EXOSC5/BTG1/HSPA9/PNPT1/CNOT7/DIS3/DCPS/EXOSC6/EXOSC10/ENO1/PATL1/TENT4A/CNOT8/LSM7/DDX6/BTG2/MTREX/PABPC1L/PNLDC1/CNOT1/DIS3L/EXOSC7/LSM8/PAN3/LSM5/LSM4/LSM3/MPHOSPH6/C1D/CNOT9/DCP1A/TOB2/EDC4/EXOSC2/XRN1/WDR61/CNOT6/LSM1/TTC37/EXOSC1/BTG3	hsa:8761/hsa:26986/hsa:5214/hsa:2027/hsa:9924/hsa:4848/hsa:22803/hsa:3329/hsa:56915/hsa:694/hsa:3313/hsa:87178/hsa:29883/hsa:22894/hsa:28960/hsa:118460/hsa:5394/hsa:2023/hsa:219988/hsa:11044/hsa:9337/hsa:51690/hsa:1656/hsa:7832/hsa:23517/hsa:80336/hsa:154197/hsa:23019/hsa:115752/hsa:23016/hsa:51691/hsa:255967/hsa:23658/hsa:25804/hsa:27258/hsa:10200/hsa:10438/hsa:9125/hsa:55802/hsa:10766/hsa:23644…	49
hsa04120	Ubiquitin mediated proteolysis	81/2692	131/6252	9.616e-06	0.000335492	ENSG00000132388/ENSG00000167986/ENSG00000108106/ENSG00000117399/ENSG00000153107/ENSG00000198833/ENSG00000184787/ENSG00000107341/ENSG00000110107/ENSG00000134574/ENSG00000036257/ENSG00000140367/ENSG00000103275/ENSG00000109332/ENSG00000009335/ENSG00000139842/ENSG00000156587/ENSG00000089053/ENSG00000182179/ENSG00000086758/ENSG00000185019/ENSG00000198373/ENSG00000182247/ENSG00000130985/ENSG00000175931…	UBE2G1/DDB1/UBE2S/CDC20/ANAPC1/UBE2J1/UBE2G2/UBE2R2/PRPF19/DDB2/CUL3/UBE2Q2/UBE2I/UBE2D3/UBE3C/CUL4A/UBE2L6/ANAPC5/UBA7/HUWE1/UBOX5/WWP2/UBE2E2/UBA1/UBE2O/ANAPC13/SKP1/UBE3B/STUB1/UBE4B/UBR5/UBE3A/UBE2K/UBE2J2/CDC16/BRCA1/PIAS2/UBE2N/UBE2Q1/TRAF6/CUL5/RNF7/TRIP12/SKP2/NEDD4L/HERC4/TRIM32/SIAH1/PIAS1/SMURF1/UBE2QL1/BIRC6/FBXW11/UBE2E3/BIRC3/FBXW7/ANAPC7/CBLB/UBE2D4/CDC27/SAE1/UBE2B/FBXO4/CBL/COP1/…	hsa:7326/hsa:1642/hsa:27338/hsa:991/hsa:64682/hsa:51465/hsa:7327/hsa:54926/hsa:27339/hsa:1643/hsa:8452/hsa:92912/hsa:7329/hsa:7323/hsa:9690/hsa:8451/hsa:9246/hsa:51433/hsa:7318/hsa:10075/hsa:22888/hsa:11060/hsa:7325/hsa:7317/hsa:63893/hsa:25847/hsa:6500/hsa:89910/hsa:10273/hsa:10277/hsa:51366/hsa:7337/hsa:3093/hsa:118424/hsa:8881/hsa:672/hsa:9063/hsa:7334/hsa:55585/hsa:7189/hsa:8065/hsa:9616/hsa:…	81
hsa03015	mRNA surveillance pathway	55/2692	84/6252	2.55523e-05	0.000729984	ENSG00000090621/ENSG00000070756/ENSG00000101654/ENSG00000160075/ENSG00000103342/ENSG00000105568/ENSG00000133226/ENSG00000120705/ENSG00000265241/ENSG00000108349/ENSG00000183684/ENSG00000005007/ENSG00000164091/ENSG00000165494/ENSG00000172531/ENSG00000090060/ENSG00000205937/ENSG00000152684/ENSG00000114503/ENSG00000150459/ENSG00000198952/ENSG00000186298/ENSG00000116698/ENSG00000100836/ENSG00000071626…	PABPC4/PABPC1/RNMT/SSU72/GSPT1/PPP2R1A/SRRM1/ETF1/RBM8A/CASC3/ALYREF/UPF1/WDR82/PCF11/PPP1CA/PAPOLA/RNPS1/PELO/NCBP2/SAP18/SMG5/PPP1CC/SMG7/PABPN1/DAZAP1/MAGOH/HBS1L/PPP2R5B/NXT1/CPSF7/PPP2R5C/PABPC1L/CPSF4/ACIN1/SYMPK/SMG6/GSPT2/PPP2R2D/CLP1/CPSF6/PPP2CA/WDR33/PPP2R5D/PNN/SMG1/PPP2R3C/PPP2R2A/NUDT21/NCBP1/CSTF2T/MAGOHB/UPF3B/FIP1L1/MSI2/PPP2R5E	hsa:8761/hsa:26986/hsa:8731/hsa:29101/hsa:2935/hsa:5518/hsa:10250/hsa:2107/hsa:9939/hsa:22794/hsa:10189/hsa:5976/hsa:80335/hsa:51585/hsa:5499/hsa:10914/hsa:10921/hsa:53918/hsa:22916/hsa:10284/hsa:23381/hsa:5501/hsa:9887/hsa:8106/hsa:26528/hsa:4116/hsa:10767/hsa:5526/hsa:29107/hsa:79869/hsa:5527/hsa:80336/hsa:10898/hsa:22985/hsa:8189/hsa:23293/hsa:23708/hsa:55844/hsa:10978/hsa:11052/hsa:5515/hsa:5…	55
hsa00020	Citrate cycle (TCA cycle)	23/2692	28/6252	2.55727e-05	0.000729984	ENSG00000100412/ENSG00000131473/ENSG00000150768/ENSG00000146701/ENSG00000100889/ENSG00000062485/ENSG00000172340/ENSG00000117118/ENSG00000091140/ENSG00000131828/ENSG00000168291/ENSG00000138413/ENSG00000091483/ENSG00000105953/ENSG00000014641/ENSG00000182054/ENSG00000173599/ENSG00000067829/ENSG00000073578/ENSG00000197444/ENSG00000143252/ENSG00000136143/ENSG00000101365	ACO2/ACLY/DLAT/MDH2/PCK2/CS/SUCLG2/SDHB/DLD/PDHA1/PDHB/IDH1/FH/OGDH/MDH1/IDH2/PC/IDH3G/SDHA/OGDHL/SDHC/SUCLA2/IDH3B	hsa:50/hsa:47/hsa:1737/hsa:4191/hsa:5106/hsa:1431/hsa:8801/hsa:6390/hsa:1738/hsa:5160/hsa:5162/hsa:3417/hsa:2271/hsa:4967/hsa:4190/hsa:3418/hsa:5091/hsa:3421/hsa:6389/hsa:55753/hsa:6391/hsa:8803/hsa:3420	23
hsa05010	Alzheimer disease	95/2692	162/6252	3.82502e-05	0.00100088	ENSG00000142192/ENSG00000174437/ENSG00000161509/ENSG00000137845/ENSG00000172115/ENSG00000010256/ENSG00000120868/ENSG00000110955/ENSG00000169021/ENSG00000130414/ENSG00000074370/ENSG00000149782/ENSG00000178741/ENSG00000156052/ENSG00000162736/ENSG00000147684/ENSG00000198668/ENSG00000137841/ENSG00000138814/ENSG00000198727/ENSG00000117118/ENSG00000168040/ENSG00000140990/ENSG00000184076/ENSG00000120910…	APP/ATP2A2/GRIN2C/ADAM10/CYCS/UQCRC1/APAF1/ATP5F1B/UQCRFS1/NDUFA10/ATP2A3/PLCB3/COX5A/GNAQ/NCSTN/NDUFB9/CALM1/PLCB2/PPP3CA/MT-CYB/SDHB/FADD/NDUFB10/UQCR10/PPP3CC/APH1A/GRIN2D/ATP5MC2/NDUFAB1/ATF6/COX7C/COX7B/ATP5MC3/NDUFB11/MT-CO1/ITPR2/CASP3/NDUFB6/NDUFS1/FAS/NAE1/PLCB1/CDK5R1/NDUFS6/APBB1/RTN4/ATP5F1A/NDUFB4/NDUFB2/CALM3/CALM2/CYC1/NDUFV3/CAPN1/NDUFA3/COX5B/NDUFA2/MT-CO2/UQCRB/SDHA/ATP5F1E/CACN…	hsa:351/hsa:488/hsa:2905/hsa:102/hsa:54205/hsa:7384/hsa:317/hsa:506/hsa:7386/hsa:4705/hsa:489/hsa:5331/hsa:9377/hsa:2776/hsa:23385/hsa:4715/hsa:801/hsa:5330/hsa:5530/hsa:4519/hsa:6390/hsa:8772/hsa:4716/hsa:29796/hsa:5533/hsa:51107/hsa:2906/hsa:517/hsa:4706/hsa:22926/hsa:1350/hsa:1349/hsa:518/hsa:54539/hsa:4512/hsa:3709/hsa:836/hsa:4712/hsa:4719/hsa:355/hsa:8883/hsa:23236/hsa:8851/hsa:4726/hsa:322…	95
hsa04714	Thermogenesis	124/2692	221/6252	4.8613e-05	0.00117419	ENSG00000173473/ENSG00000075624/ENSG00000077782/ENSG00000212907/ENSG00000184009/ENSG00000111725/ENSG00000049618/ENSG00000004487/ENSG00000164398/ENSG00000010256/ENSG00000110955/ENSG00000127616/ENSG00000169021/ENSG00000066117/ENSG00000130414/ENSG00000198763/ENSG00000117713/ENSG00000165699/ENSG00000178741/ENSG00000073584/ENSG00000198886/ENSG00000137154/ENSG00000147684/ENSG00000120733/ENSG00000108443…	SMARCC1/ACTB/FGFR1/MT-ND4L/ACTG1/PRKAB1/ARID1B/KDM1A/ACSL6/UQCRC1/ATP5F1B/SMARCA4/UQCRFS1/SMARCD1/NDUFA10/MT-ND2/ARID1A/TSC1/COX5A/SMARCE1/MT-ND4/RPS6/NDUFB9/KDM3B/RPS6KB1/COX10/MT-CYB/SDHB/NDUFB10/CREB3L4/UQCR10/CREB3L3/ZNF516/ATP5MC2/MLST8/RPS6KA2/NDUFAB1/COX7C/COX7B/ATP5MC3/COX14/NDUFB11/MT-CO1/ADCY4/CPT1A/COX17/NDUFB6/NDUFS1/NDUFAF2/NDUFS6/MTOR/ATP5F1A/MAPK13/PRKAA1/ADCY7/COX11/NDUFB4/NDUFB2/…	hsa:6599/hsa:60/hsa:2260/hsa:4539/hsa:71/hsa:5564/hsa:57492/hsa:23028/hsa:23305/hsa:7384/hsa:506/hsa:6597/hsa:7386/hsa:6602/hsa:4705/hsa:4536/hsa:8289/hsa:7248/hsa:9377/hsa:6605/hsa:4538/hsa:6194/hsa:4715/hsa:51780/hsa:6198/hsa:1352/hsa:4519/hsa:6390/hsa:4716/hsa:148327/hsa:29796/hsa:84699/hsa:9658/hsa:517/hsa:64223/hsa:6196/hsa:4706/hsa:1350/hsa:1349/hsa:518/hsa:84987/hsa:54539/hsa:4512/hsa:1968…	124
hsa05169	Epstein-Barr virus infection	92/2692	159/6252	0.000101305	0.00227212	ENSG00000179218/ENSG00000136997/ENSG00000167004/ENSG00000187555/ENSG00000169375/ENSG00000172115/ENSG00000131323/ENSG00000026025/ENSG00000108344/ENSG00000136238/ENSG00000118503/ENSG00000120868/ENSG00000134574/ENSG00000055208/ENSG00000162434/ENSG00000100603/ENSG00000168610/ENSG00000111276/ENSG00000175166/ENSG00000105810/ENSG00000184216/ENSG00000165025/ENSG00000163636/ENSG00000159352/ENSG00000170581…	CALR/MYC/PDIA3/USP7/SIN3A/CYCS/TRAF3/VIM/PSMD3/RAC1/TNFAIP3/APAF1/DDB2/TAB2/JAK1/SNW1/STAT3/CDKN1B/PSMD2/CDK6/IRAK1/SYK/PSMD6/PSMD4/STAT2/MAP2K7/PSMD1/CCND3/RBPJ/JUN/PSMD11/RELA/STAT1/PSMD7/HLA-DRB5/PSMD12/PSMD13/FADD/RB1/RIPK1/BCL2L11/CD247/CDK4/CD3E/AKT2/HDAC1/TRAF6/CCNA2/TRAF2/NCOR2/SKP2/E2F2/CASP3/PSMC5/FAS/MYD88/PSMD8/NFKB2/RELB/GADD45A/TRAF5/MAPK13/CCND2/RUNX3/MAP2K6/CDK2/MAP2K3/PSMD14/MAPK…	hsa:811/hsa:4609/hsa:2923/hsa:7874/hsa:25942/hsa:54205/hsa:7187/hsa:7431/hsa:5709/hsa:5879/hsa:7128/hsa:317/hsa:1643/hsa:23118/hsa:3716/hsa:22938/hsa:6774/hsa:1027/hsa:5708/hsa:1021/hsa:3654/hsa:6850/hsa:9861/hsa:5710/hsa:6773/hsa:5609/hsa:5707/hsa:896/hsa:3516/hsa:3725/hsa:5717/hsa:5970/hsa:6772/hsa:5713/hsa:3127/hsa:5718/hsa:5719/hsa:8772/hsa:5925/hsa:8737/hsa:10018/hsa:919/hsa:1019/hsa:916/hsa…	92
hsa05016	Huntington disease	102/2692	185/6252	0.000530299	0.0111009	ENSG00000169100/ENSG00000204843/ENSG00000108179/ENSG00000169375/ENSG00000165637/ENSG00000172115/ENSG00000010256/ENSG00000122705/ENSG00000120868/ENSG00000110955/ENSG00000169021/ENSG00000197386/ENSG00000006125/ENSG00000130414/ENSG00000132912/ENSG00000177700/ENSG00000100393/ENSG00000149782/ENSG00000178741/ENSG00000156052/ENSG00000042753/ENSG00000047315/ENSG00000213585/ENSG00000233276/ENSG00000132535…	SLC25A6/DCTN1/PPIF/SIN3A/VDAC2/CYCS/UQCRC1/CLTA/APAF1/ATP5F1B/UQCRFS1/HTT/AP2B1/NDUFA10/DCTN4/POLR2L/EP300/PLCB3/COX5A/GNAQ/AP2S1/POLR2B/VDAC1/GPX1/DLG4/POLR2F/REST/NDUFB9/CLTCL1/PLCB2/AP2M1/SLC25A5/MT-CYB/SDHB/TAF4B/POLR2E/NDUFB10/CREB3L4/UQCR10/TFAM/CREB3L3/CREBBP/ATP5MC2/HDAC1/POLR2A/NDUFAB1/COX7C/COX7B/ATP5MC3/CLTC/POLR2C/NDUFB11/MT-CO1/DNAH12/CASP3/NDUFB6/NDUFS1/PLCB1/NDUFS6/ATP5F1A/NDUFB4/N…	hsa:293/hsa:1639/hsa:10105/hsa:25942/hsa:7417/hsa:54205/hsa:7384/hsa:1211/hsa:317/hsa:506/hsa:7386/hsa:3064/hsa:163/hsa:4705/hsa:51164/hsa:5441/hsa:2033/hsa:5331/hsa:9377/hsa:2776/hsa:1175/hsa:5431/hsa:7416/hsa:2876/hsa:1742/hsa:5435/hsa:5978/hsa:4715/hsa:8218/hsa:5330/hsa:1173/hsa:292/hsa:4519/hsa:6390/hsa:6875/hsa:5434/hsa:4716/hsa:148327/hsa:29796/hsa:7019/hsa:84699/hsa:1387/hsa:517/hsa:3065/h…	102
hsa01200	Carbon metabolism	63/2692	107/6252	0.000648294	0.0123611	ENSG00000159399/ENSG00000142657/ENSG00000163931/ENSG00000067057/ENSG00000108515/ENSG00000092621/ENSG00000100412/ENSG00000177156/ENSG00000150768/ENSG00000153574/ENSG00000171314/ENSG00000102144/ENSG00000182199/ENSG00000146701/ENSG00000062485/ENSG00000074800/ENSG00000127884/ENSG00000172340/ENSG00000117118/ENSG00000082212/ENSG00000091140/ENSG00000114054/ENSG00000131828/ENSG00000168291/ENSG00000138413…	HK2/PGD/TKT/PFKP/ENO3/PHGDH/ACO2/TALDO1/DLAT/RPIA/PGAM1/PGK1/SHMT2/MDH2/CS/ENO1/ECHS1/SUCLG2/SDHB/ME2/DLD/PCCB/PDHA1/PDHB/IDH1/PKM/GOT2/FH/PSAT1/H6PD/TKFC/PGLS/OGDH/PRPS1/ACAT2/AMT/G6PD/MDH1/IDH2/HIBCH/PC/ACAT1/ALDOC/PGP/IDH3G/MCEE/ALDOB/SDHA/ADH5/OGDHL/TPI1/SHMT1/GAPDH/PSPH/SDHC/AC093512.2/SUCLA2/IDH3B/GCSH/HK1/RPE/PRPS2/GOT1	hsa:3099/hsa:5226/hsa:7086/hsa:5214/hsa:2027/hsa:26227/hsa:50/hsa:6888/hsa:1737/hsa:22934/hsa:5223/hsa:5230/hsa:6472/hsa:4191/hsa:1431/hsa:2023/hsa:1892/hsa:8801/hsa:6390/hsa:4200/hsa:1738/hsa:5096/hsa:5160/hsa:5162/hsa:3417/hsa:5315/hsa:2806/hsa:2271/hsa:29968/hsa:9563/hsa:26007/hsa:25796/hsa:4967/hsa:5631/hsa:39/hsa:275/hsa:2539/hsa:4190/hsa:3418/hsa:26275/hsa:5091/hsa:38/hsa:230/hsa:283871/hsa…	63
hsa00190	Oxidative phosphorylation	74/2692	129/6252	0.000669231	0.0123611	ENSG00000180817/ENSG00000212907/ENSG00000010256/ENSG00000110955/ENSG00000047249/ENSG00000169021/ENSG00000071553/ENSG00000130414/ENSG00000198763/ENSG00000178741/ENSG00000147416/ENSG00000033627/ENSG00000198886/ENSG00000147684/ENSG00000136888/ENSG00000006695/ENSG00000198727/ENSG00000117118/ENSG00000159720/ENSG00000140990/ENSG00000171130/ENSG00000184076/ENSG00000185344/ENSG00000135390/ENSG00000004779…	PPA1/MT-ND4L/UQCRC1/ATP5F1B/ATP6V1H/UQCRFS1/ATP6AP1/NDUFA10/MT-ND2/COX5A/ATP6V1B2/ATP6V0A1/MT-ND4/NDUFB9/ATP6V1G1/COX10/MT-CYB/SDHB/ATP6V0D1/NDUFB10/ATP6V0E2/UQCR10/ATP6V0A2/ATP5MC2/NDUFAB1/COX7C/COX7B/ATP5MC3/NDUFB11/MT-CO1/COX17/NDUFB6/NDUFS1/ATP6V0E1/NDUFS6/PPA2/ATP5F1A/COX11/NDUFB4/NDUFB2/CYC1/NDUFV3/NDUFA3/COX5B/NDUFA2/MT-CO2/UQCRB/SDHA/LHPP/ATP5F1E/MT-ND1/COX4I1/ATP6V0C/MT-ND3/NDUFA8/ATP5PF…	hsa:5464/hsa:4539/hsa:7384/hsa:506/hsa:51606/hsa:7386/hsa:537/hsa:4705/hsa:4536/hsa:9377/hsa:526/hsa:535/hsa:4538/hsa:4715/hsa:9550/hsa:1352/hsa:4519/hsa:6390/hsa:9114/hsa:4716/hsa:155066/hsa:29796/hsa:23545/hsa:517/hsa:4706/hsa:1350/hsa:1349/hsa:518/hsa:54539/hsa:4512/hsa:10063/hsa:4712/hsa:4719/hsa:8992/hsa:4726/hsa:27068/hsa:498/hsa:1353/hsa:4710/hsa:4708/hsa:1537/hsa:4731/hsa:4696/hsa:1329/hs…	74
hsa05161	Hepatitis B	71/2692	124/6252	0.000916273	0.0155859	ENSG00000215301/ENSG00000128272/ENSG00000167986/ENSG00000136997/ENSG00000126767/ENSG00000172115/ENSG00000154229/ENSG00000166913/ENSG00000120868/ENSG00000134574/ENSG00000134308/ENSG00000162434/ENSG00000071553/ENSG00000168610/ENSG00000111276/ENSG00000105810/ENSG00000100393/ENSG00000164924/ENSG00000170581/ENSG00000134248/ENSG00000177606/ENSG00000173039/ENSG00000115415/ENSG00000072736/ENSG00000168040…	DDX3X/ATF4/DDB1/MYC/ELK1/CYCS/PRKCA/YWHAB/APAF1/DDB2/YWHAQ/JAK1/ATP6AP1/STAT3/CDKN1B/CDK6/EP300/YWHAZ/STAT2/LAMTOR5/JUN/RELA/STAT1/NFATC3/FADD/SMAD4/RB1/CDK4/CREB3L4/AKT2/PRKCB/CREB3L3/CREBBP/CCNA2/PTEN/PCNA/E2F2/CASP3/TGFBR1/NFATC4/FAS/MYD88/GRB2/CDK2/CREB1/MAPK8/SMAD3/MAP2K1/HSPG2/IRF7/STAT4/MAPK9/PRKCG/TGFB3/PIK3CB/NRAS/MAP2K2/E2F3/EGR3/STAT5B/TGFB1/TP53/IRF3/KRAS/STAT5A/MAP3K1/BIRC5/CREB3L2/M…	hsa:1654/hsa:468/hsa:1642/hsa:4609/hsa:2002/hsa:54205/hsa:5578/hsa:7529/hsa:317/hsa:1643/hsa:10971/hsa:3716/hsa:537/hsa:6774/hsa:1027/hsa:1021/hsa:2033/hsa:7534/hsa:6773/hsa:10542/hsa:3725/hsa:5970/hsa:6772/hsa:4775/hsa:8772/hsa:4089/hsa:5925/hsa:1019/hsa:148327/hsa:208/hsa:5579/hsa:84699/hsa:1387/hsa:890/hsa:5728/hsa:5111/hsa:1870/hsa:836/hsa:7046/hsa:4776/hsa:355/hsa:4615/hsa:2885/hsa:1017/hsa:…	71
hsa00970	Aminoacyl-tRNA biosynthesis	28/2692	41/6252	0.000943095	0.0155859	ENSG00000196305/ENSG00000106105/ENSG00000136628/ENSG00000140105/ENSG00000133706/ENSG00000247626/ENSG00000134684/ENSG00000145982/ENSG00000065427/ENSG00000116120/ENSG00000031698/ENSG00000116874/ENSG00000115866/ENSG00000067704/ENSG00000166986/ENSG00000104835/ENSG00000179988/ENSG00000139131/ENSG00000011376/ENSG00000179115/ENSG00000172053/ENSG00000162396/ENSG00000130348/ENSG00000103356/ENSG00000170445…	IARS/GARS/EPRS/WARS/LARS/MARS2/YARS/FARS2/KARS/FARSB/SARS/WARS2/DARS/IARS2/MARS/SARS2/PSTK/YARS2/LARS2/FARSA/QARS/PARS2/QRSL1/EARS2/HARS/CARS2/TARS/TARS2	hsa:3376/hsa:2617/hsa:2058/hsa:7453/hsa:51520/hsa:92935/hsa:8565/hsa:10667/hsa:3735/hsa:10056/hsa:6301/hsa:10352/hsa:1615/hsa:55699/hsa:4141/hsa:54938/hsa:118672/hsa:51067/hsa:23395/hsa:2193/hsa:5859/hsa:25973/hsa:55278/hsa:124454/hsa:3035/hsa:79587/hsa:6897/hsa:80222	28
hsa04218	Cellular senescence	79/2692	141/6252	0.00117149	0.0176701	ENSG00000169100/ENSG00000136997/ENSG00000134057/ENSG00000165637/ENSG00000162889/ENSG00000157456/ENSG00000172531/ENSG00000152518/ENSG00000165699/ENSG00000105810/ENSG00000266094/ENSG00000213585/ENSG00000112576/ENSG00000104320/ENSG00000198668/ENSG00000092439/ENSG00000138814/ENSG00000005022/ENSG00000205250/ENSG00000173039/ENSG00000072736/ENSG00000186298/ENSG00000139687/ENSG00000096717/ENSG00000135446…	SLC25A6/MYC/CCNB1/VDAC2/MAPKAPK2/CCNB2/PPP1CA/ZFP36L2/TSC1/CDK6/RASSF5/VDAC1/CCND3/NBN/CALM1/TRPM7/PPP3CA/SLC25A5/E2F4/RELA/NFATC3/PPP1CC/RB1/SIRT1/CDK4/RBBP4/EIF4EBP1/AKT2/PPP3CC/TGFBR2/CCNA2/PTEN/HIPK1/ITPR2/E2F2/TGFBR1/NFATC4/RBL2/ATR/MTOR/RBL1/GADD45A/MAPK13/CCND2/ATM/ETS1/FBXW11/MAP2K6/CALM3/CALM2/CDK2/RRAS/CAPN1/MAP2K3/HUS1/TRAF3IP2/RAD1/FOXM1/SMAD3/MAP2K1/CACNA1D/SLC25A4/HIPK3/TGFB3/PIK3CB…	hsa:293/hsa:4609/hsa:891/hsa:7417/hsa:9261/hsa:9133/hsa:5499/hsa:678/hsa:7248/hsa:1021/hsa:83593/hsa:7416/hsa:896/hsa:4683/hsa:801/hsa:54822/hsa:5530/hsa:292/hsa:1874/hsa:5970/hsa:4775/hsa:5501/hsa:5925/hsa:23411/hsa:1019/hsa:5928/hsa:1978/hsa:208/hsa:5533/hsa:7048/hsa:890/hsa:5728/hsa:204851/hsa:3709/hsa:1870/hsa:7046/hsa:4776/hsa:5934/hsa:545/hsa:2475/hsa:5933/hsa:1647/hsa:5603/hsa:894/hsa:472/…	79
hsa05168	Herpes simplex infection	78/2692	139/6252	0.00118175	0.0176701	ENSG00000108561/ENSG00000100650/ENSG00000056558/ENSG00000124193/ENSG00000165119/ENSG00000172534/ENSG00000187555/ENSG00000161547/ENSG00000111786/ENSG00000172115/ENSG00000131323/ENSG00000101266/ENSG00000205581/ENSG00000086232/ENSG00000183684/ENSG00000263465/ENSG00000107341/ENSG00000112081/ENSG00000070770/ENSG00000055208/ENSG00000135801/ENSG00000162434/ENSG00000172531/ENSG00000100393/ENSG00000133794…	C1QBP/SRSF5/TRAF1/SRSF6/HNRNPK/HCFC1/USP7/SRSF2/SRSF9/CYCS/TRAF3/CSNK2A1/HMGN1/EIF2AK1/ALYREF/SRSF8/UBE2R2/SRSF3/CSNK2A2/TAB2/TAF5L/JAK1/PPP1CA/EP300/ARNTL/STAT2/EIF2S1/SKP1/JUN/RELA/STAT1/HLA-DRB5/PPP1CC/PER1/FADD/TAF4B/GTF2I/CREBBP/POLR2A/TRAF6/MCRS1/TRAF2/TAF3/SKP2/CASP3/FAS/MYD88/TRAF5/SP100/PTPN11/SRSF4/CDK2/GTF2IRD1/SRPK1/MAPK8/IFIT1/IRF7/MAPK9/CSNK2A3/PER3/EIF2AK3/EIF2AK2/TAF6L/IRF9/CDK1/T…	hsa:708/hsa:6430/hsa:7185/hsa:6431/hsa:3190/hsa:3054/hsa:7874/hsa:6427/hsa:8683/hsa:54205/hsa:7187/hsa:1457/hsa:3150/hsa:27102/hsa:10189/hsa:10929/hsa:54926/hsa:6428/hsa:1459/hsa:23118/hsa:27097/hsa:3716/hsa:5499/hsa:2033/hsa:406/hsa:6773/hsa:1965/hsa:6500/hsa:3725/hsa:5970/hsa:6772/hsa:3127/hsa:5501/hsa:5187/hsa:8772/hsa:6875/hsa:2969/hsa:1387/hsa:5430/hsa:7189/hsa:10445/hsa:7186/hsa:83860/hsa:6…	78
hsa00240	Pyrimidine metabolism	56/2692	97/6252	0.00238314	0.0340139	ENSG00000068654/ENSG00000143179/ENSG00000100413/ENSG00000147647/ENSG00000058600/ENSG00000171793/ENSG00000138035/ENSG00000171302/ENSG00000177700/ENSG00000047315/ENSG00000125630/ENSG00000100142/ENSG00000084774/ENSG00000171453/ENSG00000099817/ENSG00000148229/ENSG00000162368/ENSG00000013503/ENSG00000181222/ENSG00000179958/ENSG00000102978/ENSG00000062822/ENSG00000198056/ENSG00000175482/ENSG00000100479…	POLR1A/UCK2/POLR3H/DPYS/POLR3E/CTPS1/PNPT1/CANT1/POLR2L/POLR2B/POLR1B/POLR2F/CAD/POLR1C/POLR2E/POLE3/CMPK1/POLR3B/POLR2A/DCTPP1/POLR2C/POLD1/PRIM1/POLD4/POLE2/ENTPD5/DHODH/TWISTNB/POLE4/NME4/DCTD/TYMP/RRM2/PNP/NT5E/AK9/POLD2/POLR3A/NME1/POLR2D/POLR1D/POLD3/POLA1/TK1/POLR3C/POLR3F/DCK/NT5C2/DUT/NT5C/NT5M/POLR2K/NT5C3B/ENPP3/NT5C3A/UMPS	hsa:25885/hsa:7371/hsa:171568/hsa:1807/hsa:55718/hsa:1503/hsa:87178/hsa:124583/hsa:5441/hsa:5431/hsa:84172/hsa:5435/hsa:790/hsa:9533/hsa:5434/hsa:54107/hsa:51727/hsa:55703/hsa:5430/hsa:79077/hsa:5432/hsa:5424/hsa:5557/hsa:57804/hsa:5427/hsa:957/hsa:1723/hsa:221830/hsa:56655/hsa:4833/hsa:1635/hsa:1890/hsa:6241/hsa:4860/hsa:4907/hsa:221264/hsa:5425/hsa:11128/hsa:4830/hsa:5433/hsa:51082/hsa:10714/hs…	56
hsa05012	Parkinson disease	75/2692	136/6252	0.00275085	0.0375551	ENSG00000169100/ENSG00000132388/ENSG00000212907/ENSG00000108179/ENSG00000165637/ENSG00000172115/ENSG00000198833/ENSG00000184787/ENSG00000010256/ENSG00000120868/ENSG00000110955/ENSG00000169021/ENSG00000156587/ENSG00000130414/ENSG00000198763/ENSG00000178741/ENSG00000198886/ENSG00000182179/ENSG00000213585/ENSG00000130985/ENSG00000147684/ENSG00000005022/ENSG00000198727/ENSG00000117118/ENSG00000160087…	SLC25A6/UBE2G1/MT-ND4L/PPIF/VDAC2/CYCS/UBE2J1/UBE2G2/UQCRC1/APAF1/ATP5F1B/UQCRFS1/UBE2L6/NDUFA10/MT-ND2/COX5A/MT-ND4/UBA7/VDAC1/UBA1/NDUFB9/SLC25A5/MT-CYB/SDHB/UBE2J2/NDUFB10/UQCR10/ATP5MC2/NDUFAB1/COX7C/COX7B/ATP5MC3/NDUFB11/MT-CO1/CASP3/PARK7/NDUFB6/NDUFS1/NDUFS6/ATP5F1A/NDUFB4/NDUFB2/DRD2/CYC1/NDUFV3/NDUFA3/COX5B/NDUFA2/MT-CO2/UQCRB/SDHA/ATP5F1E/MT-ND1/COX4I1/SLC25A4/MT-ND3/UBB/NDUFA8/ATP5PF/S…	hsa:293/hsa:7326/hsa:4539/hsa:10105/hsa:7417/hsa:54205/hsa:51465/hsa:7327/hsa:7384/hsa:317/hsa:506/hsa:7386/hsa:9246/hsa:4705/hsa:4536/hsa:9377/hsa:4538/hsa:7318/hsa:7416/hsa:7317/hsa:4715/hsa:292/hsa:4519/hsa:6390/hsa:118424/hsa:4716/hsa:29796/hsa:517/hsa:4706/hsa:1350/hsa:1349/hsa:518/hsa:54539/hsa:4512/hsa:836/hsa:11315/hsa:4712/hsa:4719/hsa:4726/hsa:498/hsa:4710/hsa:4708/hsa:1813/hsa:1537/hsa…	75
hsa04142	Lysosome	67/2692	120/6252	0.00301921	0.0382883	ENSG00000197746/ENSG00000197081/ENSG00000185896/ENSG00000065000/ENSG00000122705/ENSG00000131238/ENSG00000138760/ENSG00000131400/ENSG00000047249/ENSG00000119655/ENSG00000109861/ENSG00000071553/ENSG00000172543/ENSG00000103723/ENSG00000033627/ENSG00000100448/ENSG00000213614/ENSG00000070371/ENSG00000110911/ENSG00000018280/ENSG00000162511/ENSG00000159720/ENSG00000005893/ENSG00000010404/ENSG00000107331…	PSAP/IGF2R/LAMP1/AP3D1/CLTA/PPT1/SCARB2/NAPSA/ATP6V1H/NPC2/CTSC/ATP6AP1/CTSW/AP3B2/ATP6V0A1/CTSG/HEXA/CLTCL1/SLC11A2/SLC11A1/LAPTM5/ATP6V0D1/LAMP2/IDS/ABCA2/GLB1/ATP6V0A2/CTSS/ARSA/CLTC/LGMN/HEXB/AP4S1/SGSH/DNASE2/M6PR/GNS/CTSO/ARSB/AP1S1/CTSK/AP1G1/GNPTAB/TPP1/LAPTM4B/CTSA/HYAL1/ATP6V0C/CTSV/LAPTM4A/GAA/LIPA/NAGPA/AP1M1/ASAH1/SORT1/MFSD8/ATP6V0B/AP4E1/CTSD/LAMP3/HGSNAT/PLA2G15/GUSB/FUCA1/AP4B1/N…	hsa:5660/hsa:3482/hsa:3916/hsa:8943/hsa:1211/hsa:5538/hsa:950/hsa:9476/hsa:51606/hsa:10577/hsa:1075/hsa:537/hsa:1521/hsa:8120/hsa:535/hsa:1511/hsa:3073/hsa:8218/hsa:4891/hsa:6556/hsa:7805/hsa:9114/hsa:3920/hsa:3423/hsa:20/hsa:2720/hsa:23545/hsa:1520/hsa:410/hsa:1213/hsa:5641/hsa:3074/hsa:11154/hsa:6448/hsa:1777/hsa:4074/hsa:2799/hsa:1519/hsa:411/hsa:1174/hsa:1513/hsa:164/hsa:79158/hsa:1200/hsa:55…	67
hsa01230	Biosynthesis of amino acids	42/2692	70/6252	0.00304843	0.0382883	ENSG00000060982/ENSG00000163931/ENSG00000067057/ENSG00000108515/ENSG00000092621/ENSG00000100412/ENSG00000177156/ENSG00000130707/ENSG00000116984/ENSG00000153574/ENSG00000171314/ENSG00000102144/ENSG00000135821/ENSG00000182199/ENSG00000151224/ENSG00000062485/ENSG00000074800/ENSG00000138413/ENSG00000067225/ENSG00000125166/ENSG00000135069/ENSG00000059573/ENSG00000147224/ENSG00000182054/ENSG00000070669…	BCAT1/TKT/PFKP/ENO3/PHGDH/ACO2/TALDO1/ASS1/MTR/RPIA/PGAM1/PGK1/GLUL/SHMT2/MAT1A/CS/ENO1/IDH1/PKM/GOT2/PSAT1/ALDH18A1/PRPS1/IDH2/ASNS/PC/ALDOC/IDH3G/ALDOB/MAT2B/NAGS/TPI1/SHMT1/GAPDH/PSPH/CBS/AC093512.2/IDH3B/MAT2A/RPE/PRPS2/GOT1	hsa:586/hsa:7086/hsa:5214/hsa:2027/hsa:26227/hsa:50/hsa:6888/hsa:445/hsa:4548/hsa:22934/hsa:5223/hsa:5230/hsa:2752/hsa:6472/hsa:4143/hsa:1431/hsa:2023/hsa:3417/hsa:5315/hsa:2806/hsa:29968/hsa:5832/hsa:5631/hsa:3418/hsa:440/hsa:5091/hsa:230/hsa:3421/hsa:229/hsa:27430/hsa:162417/hsa:7167/hsa:6470/hsa:2597/hsa:5723/hsa:875/hsa:226/hsa:3420/hsa:4144/hsa:6120/hsa:5634/hsa:2805	42
